# Supplementary material for: Fabrication of a COF-5 membrane on a functionalized α-Al2O3 ceramic support using a microwave irradiation method
Source: Royal Society of Chemistry journal article supplement (doi:10.1039/c3cc48065h), 2013-12-02
Supplement: c3cc48065h.pdf [file c3cc48065h.pdf]

## Supporting information

### Fabrication of a COF-5 membrane on functionalized $\alpha$ -Al<sub>2</sub>O<sub>3</sub> ceramic support using microwave irradiation method

Dandan Hao,<sup>ab</sup> Jinna Zhang,<sup>bc</sup> Hui Lu,<sup>\*b</sup> Wenguang Leng,<sup>b</sup> Rile Ge,<sup>\*b</sup> Xiaonan Dai<sup>a</sup> and Yanan Gao.<sup>b</sup>

<sup>a</sup> School of Chemistry and Pharmaceutical Engineering, Qilu University of Technology, Daxue Road, Western University Science Park, Jinan 250353, P.R. China

<sup>b</sup> China Ionic Liquid Laboratory (CHILL) and State Key Laboratory of Catalysis (SKLC), Dalian Institute of Chemical Physics, Chinese Academy of Sciences, Zhongshan Road 457, Dalian 116023, P. R. China.

Tel: 86 411 84379180; fax: 86 411 84379301; E-mail addresses: huilu@dicp.ac.cn; rge@dicp.ac.cn.

<sup>c</sup> College of Chemistry and Materials Science, Liaoning University of Petroleum and Chemical Technology, Fushun 113001, P. R. China

## 1. Experimental Section

### 1.1 Materials:

All chemicals were purchased from commercial sources and used without any further purification: ammonium persulfate (AR, Kermel, China), catechol (99.0%, Aladdin, China), benzene-1,4-diboronic acid ( $\geq 95.0\%$ , Sigma-Aldrich), 4-formylphenylboronic acid (97%, Aladdin, China), (3-aminopropyl)triethoxysilane (APTES, 99%, Aladdin, China), 1,4-dioxane ( $\geq 99.5\%$ , Aladdin, China), mesitylene (98%, Sigma-Aldrich).

Porous  $\alpha$ -Al<sub>2</sub>O<sub>3</sub> ceramic supports (obtained from Singapore Hyflux Company, with a pore size of 40 nm in the surface modification layer of the asymmetrical support) were used as supports.

## 1.2 Synthesis of HHTP

17.20 g of ammonium persulfate (0.075 mol) was added to 8.25 g of catechol (0.075 mol) dispersed in 25 ml of a 70 wt.% aqueous solution of sulfuric acid. The mixture was stirred for 7 h at room temperature, and the resultant precipitate was then filtered and washed with water. 300 ml of acetone and 0.75 g of activated carbon were added to the precipitate, the mixture was stirred for 30 min at room temperature, and insoluble matter was subsequently filtered off from the mixture. 300 ml of deionized water was added to the filter, and then acetone was distilled off under atmospheric pressure. The resultant precipitate was filtered and dried under reduced pressure to afford 3.457 g of HHTP crystals (yield: 41.9%; purity > 99%). The reaction equation is as follows:

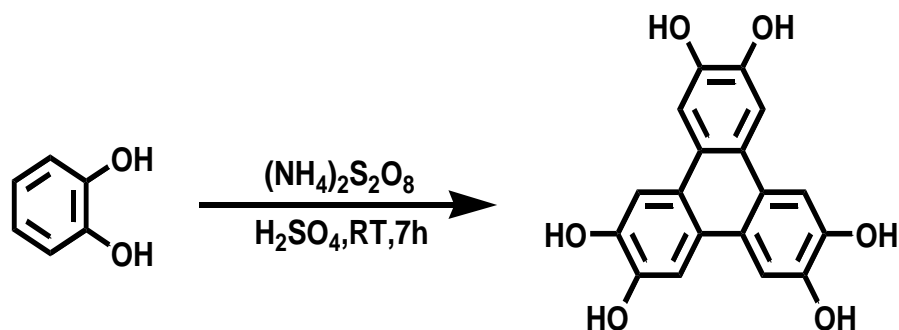

Fig. S1

## 1.3 Synthesis of COF-5 and COF-5 membrane by using microwave

## **irradiation**

Sealed the mixture of a 3:2 molar ratio solution of 1,4-benzenediboronic acid (BDDBA; 185.0 mg, 1.11 mmol) and 2,3,6,7,10,11-hexahydroxytriphenylene (HHTP; 241.5 mg, 0.745 mmol) immersed in a 1:1 v:v mixture of mesitylene: 1,4-dioxane (20 mL) under nitrogen in a 35 ml glass microwave tube and then heated the tube by microwave irradiation at 100°C with stirring for 60 mins at a power of 300 W using a Microsynth Plus-position microwave reactor(Milestone Germany). A gray precipitate was observed to form in the reaction vessel. The resulting gray-purple powder was filtered and washed with anhydrous acetone for several times under nitrogen and then dried in a vacuum desiccator at 70°C for 24 h. The finally purified COF-5 was isolated as a gray solid, and then the COF-5 membrane were fabricated in the same reaction vessel. The reaction equation is as follows:

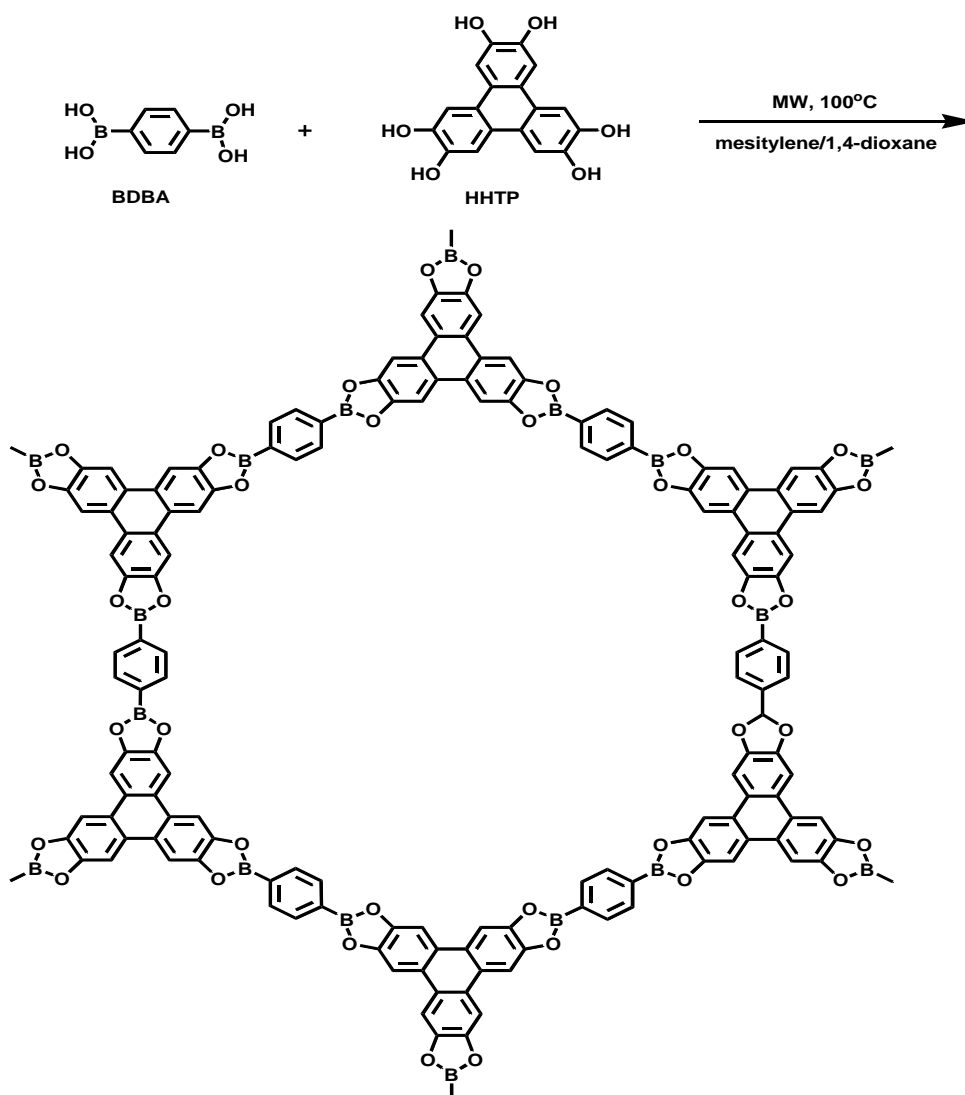

Fig. S2

#### 1.4 Modification of $\alpha$ - $\text{Al}_2\text{O}_3$ ceramic supports

Porous ceramic  $\alpha$ - $\text{Al}_2\text{O}_3$  supports were immersed in 50 ml of hydrochloric acid solution (1 mol/L) for 5 h, then washed and dried, and then treated with APTES (98.29 mg in 20 ml toluene) at 100°C for 3 h under argon, leading to APTES monolayers deposited on the surface of  $\alpha$ - $\text{Al}_2\text{O}_3$  ceramic supports. Washed the supports with ethanol for several times, then immersed the tubes in a solution of 20 ml ethanol and 4-Formylphenylboronic acid (29.6 mg) for 1-15 h, and then the ceramic

supports were washed by ethanol for several times, and then dried in a vacuum desiccator at room temperature for 24 h.

## **2 Characterizations**

Scanning electron microscopy (SEM) micrographs were taken on a Netherlands QUANTA 200 FEG with a cold field emission gun operating at 20 kV. The X-ray diffraction (XRD) patterns were recorded at room temperature with a Japan D/MAX-2500/PC X-ray diffractometer with CuK $\alpha$  radiation at 20 kV and 40 mA. Samples were prepared as a compressed IR-transparent KBr disc for analysis and scanned in transmission mode by a Tensor 27 FTIR spectrophotometer.
